# Supplementary material for: Comparing general and specialized word embeddings for biomedical named entity recognition
Source: PeerJ Comput Sci. 2021 Feb 18;7:e384. doi: 10.7717/peerj-cs.384 (PMC7959609; doi:10.7717/peerj-cs.384)
Supplement: Supplemental Information 6 — The excel file contains 7 different tabs labeled as "Results", "1", "2", "4", "8", "16", "32". The "Results" tab presents the precision, recall, and F1-score of the highest F1-score among all the experiments performed according to the sections "Fourth experiment: General vs. Specific contextualized word embeddings" and "Result". The best result for general vs. specific contextualized word embedding is highlighted in green. On the other hand, tabs "1", "2", "4", "8", "16", "32" present the results for each particular mini-batch, the size of the mini-batch is indicated by the tab name. As equal as "Result" tab precision, recall and F1-score are reported for general and specific contextualized word embeddings. [file peerj-cs-07-384-s006.xlsx]

## Sheet: Results
	Corpus	Word embedding		Precision	Recall	F1-score
	DrugBank	ELMo	original	82.29	86.31	84.26
		ELMo	Pubmed	87.03	89.58	88.28
		PooledFlair	mix	81.9	86.97	84.36
		PooledFlair	Pubmed	84.92	89.9	87.34
		Transformer	bert	76.28	82.74	79.37
		Transformer	biobert	82.58	89.58	85.94
	MedLine	ELMo	original	58.8	54.59	56.61
		ELMo	Pubmed	67.29	72.26	69.69
		PooledFlair	mix	52.78	51.01	51.88
		PooledFlair	Pubmed	64.81	62.64	63.71
		Transformer	bert	48.44	55.48	51.72
		Transformer	biobert	60	68.46	63.95

## Sheet: 1
	minibatch size = 1
	Corpus	Word embedding		Precision	Recall	F1-score
	DrugBank	ELMo	original	75.56	76.55	76.05
		ELMo	Pubmed	85.2	84.36	84.78
		PooledFlair	mix	79.08	78.83	78.96
		PooledFlair	Pubmed	84.97	84.69	84.83
		Transformer	bert	68.4	72.64	70.46
		Transformer	biobert	75.4	76.87	76.13
	MedLine	ELMo	original	56.44	46.09	50.74
		ELMo	Pubmed	67.42	67.11	67.26
		PooledFlair	mix	43.28	36.02	39.32
		PooledFlair	Pubmed	60.52	52.13	56.01
		Transformer	bert	45.83	34.45	39.34
		Transformer	biobert	50.33	34.45	40.9

## Sheet: 2
	minibatch size = 2
	Corpus	Word embedding		Precision	Recall	F1-score
	DrugBank	ELMo	original	77.49	78.5	77.99
		ELMo	Pubmed	87.46	88.6	88.03
		PooledFlair	mix	78.39	79.15	78.77
		PooledFlair	Pubmed	84.98	86.64	85.81
		Transformer	bert	68.5	72.96	70.66
		Transformer	biobert	83.23	87.3	85.21
	MedLine	ELMo	original	55.92	45.41	50.12
		ELMo	Pubmed	68.25	70.69	69.45
		PooledFlair	mix	48.73	34.45	40.37
		PooledFlair	Pubmed	59.4	53.02	56.03
		Transformer	bert	44.26	35.35	39.3
		Transformer	biobert	53.17	58.17	55.56

## Sheet: 4
	minibatch size = 4
	Corpus	Word embedding		Precision	Recall	F1-score
	DrugBank	ELMo	original	79.81	82.41	81.09
		ELMo	Pubmed	86.08	88.6	87.32
		PooledFlair	mix	79.18	81.76	80.45
		PooledFlair	Pubmed	84.57	85.67	85.11
		Transformer	bert	67.99	72.64	70.24
		Transformer	biobert	76	80.46	78.16
	MedLine	ELMo	original	57.43	51.9	54.52
		ELMo	Pubmed	66.46	70.47	68.4
		PooledFlair	mix	51.69	40.94	45.69
		PooledFlair	Pubmed	62.25	63.09	62.67
		Transformer	bert	36.74	39.37	38.01
		Transformer	biobert	50.37	60.18	54.84

## Sheet: 8
	minibatch size = 8
	Corpus	Word embedding		Precision	Recall	F1-score
	DrugBank	ELMo	original	81.03	82.08	81.55
		ELMo	Pubmed	85.71	87.95	86.82
		PooledFlair	mix	79.87	82.74	81.28
		PooledFlair	Pubmed	84.74	88.6	86.62
		Transformer	bert	71.21	76.55	73.78
		Transformer	biobert	80.75	84.69	82.67
	MedLine	ELMo	original	58.8	54.59	56.61
		ELMo	Pubmed	67.29	72.26	69.69
		PooledFlair	mix	52.63	46.98	49.65
		PooledFlair	Pubmed	64.81	62.64	63.71
		Transformer	bert	49.27	53.02	51.08
		Transformer	biobert	58.35	66.44	62.13

## Sheet: 16
	minibatch size = 16
	Corpus	Word embedding		Precision	Recall	F1-score
	DrugBank	ELMo	original	81.48	85.99	83.68
		ELMo	Pubmed	87.03	89.58	88.28
		PooledFlair	mix	81.68	85.67	83.62
		PooledFlair	Pubmed	83.54	89.25	86.3
		Transformer	bert	76.28	82.74	79.37
		Transformer	biobert	82.14	89.9	85.85
	MedLine	ELMo	original	55.04	56.15	55.59
		ELMo	Pubmed	67.29	72.26	69.69
		PooledFlair	mix	52.78	51.01	51.88
		PooledFlair	Pubmed	63.74	61.74	62.73
		Transformer	bert	48.44	55.48	51.72
		Transformer	biobert	60	68.46	63.95

## Sheet: 32
	minibatch size = 32
	Corpus	Word embedding		Precision	Recall	F1-score
	DrugBank	ELMo	original	82.29	86.31	84.26
		ELMo	Pubmed	86.66	88.92	87.78
		PooledFlair	mix	81.9	86.97	84.36
		PooledFlair	Pubmed	84.92	89.9	87.34
		Transformer	bert	76.44	82.41	79.31
		Transformer	biobert	82.58	89.58	85.94
	MedLine	ELMo	original	55.98	52.34	54.1
		ELMo	Pubmed	66.05	72.7	69.22
		PooledFlair	mix	52.78	48.76	50.7
		PooledFlair	Pubmed	63.61	63.75	63.68
		Transformer	bert	43.78	45.64	44.69
		Transformer	biobert	53.86	65.55	59.13
