# Supplementary material for: Comparing general and specialized word embeddings for biomedical named entity recognition
Source: PeerJ journal article supplement (doi:10.7717/peerj-cs.384), 2021-02-18
Supplement: Supplemental_Data_S4.zip [file semantic_similarity.xlsx]

## Sheet: Pedersen
Term 1	Term 2	Physician	Common Crawl	Pyysalo
Renal failure	Kidney failure	4	0.87324	0.860478
Heart	Myocardium	3.3333	0.130094	0.310181
Stroke	Infarct	3	0.279514	0.394916
Abortion	Miscarriage	3	0.476829	0.609721
Delusion	Schizophrenia	3	0.312975	0.515719
Congestive heart failure	Pulmonary edema	3	0.574661	0.316427
Metastasis	Adenocarcinoma	2.6667	0.599865	0.664836
Calcification	Stenosis	2.6667	0.508834	0.685502
Diarrhea	Stomach cramps	2.3333	0.641592	0.603494
Mitral stenosis	Atrial fibrillation	2.3333	0.626913	0.408411
Chronic obstructive pulmonary disease	Lung infiltrates	2.3333	0.553017	0.482668
Rheumatoid arthritis	Lupus	2	0.62991	0.494681
Brain tumor	Intracranial hemorrhage	2	0.507499	0.360273
Carpal tunnel syndrome	Osteoarthritis	2	0.449582	0.256381
Diabetes mellitus	Hypertension	2	0.749802	0.655646
Acne	Syringe	2	0.126288	0.217962
Antibiotic	Allergy	1.6667	0.421776	0.243174
Cortisone	Total knee replacement	1.6667	0.041636	0.110969
Pulmonary embolus	Myocardial infarction	1.6667	0.584158	0.384543
Pulmonary Fibrosis	Lung Cancer	1.6667	0.676629	0.557289
Cholangiocarcinoma	Colonoscopy	1.3333	0.274381	0.342964
Lymphoid hyperplasia	Laryngeal Cancer	1.3333	0.383778	0.297594
Multiple Sclerosis	Psychosis	1	0.31669	0.443149
Appendicitis	Osteoporosis	1	0.351367	0.490237
Rectal polyp	Aorta	1	0.332054	0.252759
Xerostomia	Alcoholic cirrhosis	1	0.198096	0.173481
Peptic ulcer disease	Myopia	1	0.200358	0.313866
Depression	Cellulitis	1	0.109972	0.143043
Varicose vein	Entire knee meniscus	1	0.267332	0.203129
Hyperlipidemia	Metastasis	1	0.278009	0.360993
			0.446004	0.575218

## Sheet: Hliaoutakis
Term 1	Term 2	Physician	Common Crawl	Pyysalo
Anemia	Appendicitis	0.031	0.48989	0.56797
Meningitis	Tricuspid Atresia	0.031	0.243237	0.351673
Sinusitis	Mental Retardation	0.031	0.166703	0.309303
Dementia	Atopic Dermatitis	0.062	0.340711	0.346372
Acquired Immunodeficiency Syndrome	Congenital Heart Defects	0.062	0.597286	0.529176
Bacterial Pneumonia	Malaria	0.156	0.526471	0.467881
Osteoporosis	Patent Ductus Arteriosus	0.156	0.153022	0.217047
Amino Acid Sequence	Anti Bacterial Agents	0.156	0.427586	0.421915
Otitis Media	Infantile Colic	0.156	0.313892	0.386083
Hyperlipidemia	Hyperkalemia	0.156	0.484068	0.532062
Neonatal Jaundice	Sepsis	0.187	0.562838	0.590382
Asthma	Pneumonia	0.375	0.580722	0.517858
Hypothyroidism	Hyperthyroidism	0.406	0.777224	0.893663
Sarcoidosis	Tuberculosis	0.406	0.478158	0.483505
Sickle Cell Anemia	Iron Deficiency Anemia	0.437	0.741085	0.698158
Adenovirus	Rotavirus	0.437	0.552909	0.582421
Lactose Intolerance	Irritable Bowel Syndrome	0.468	0.50795	0.480603
Hypertension	Kidney Failure	0.5	0.61422	0.565213
Diabetic Nephropathy	Diabetes Mellitus	0.5	0.67839	0.719708
Pulmonary Valve Stenosis	Aortic Valve Stenosis	0.531	0.927838	0.920121
Hepatitis B	Hepatitis C	0.562	0.91788	0.969232
Failure to Thrive	Urinary Tract Infection	0.625	0.228465	0.44073
Urinary Tract Infection	Pyelonephritis	0.656	0.52699	0.513362
Migraine	Headache	0.718	0.766735	0.632429
Myocardial Ischemia	Myocardial Infarction	0.75	0.926656	0.865434
Carcinoma	Neoplasm	0.75	0.570083	0.742949
Breast Feeding	Lactation	0.843	0.452149	0.619464
Seizures	Convulsions	0.843	0.577551	0.78215
Pain	Ache	0.875	0.446989	0.12317
Malnutrition	Nutritional Deficiency	0.875	0.498792	0.621149
Down Syndrome	Trisomy 21	0.875	0.448142	0.447703
Measles	Rubeola	0.906	0.537083	0.595389
Antibiotics	Antibacterial Agents	0.937	0.407251	0.553286
Chicken Pox	Varicella	0.968	0.486287	0.427809
			0.292395	0.28353

## Sheet: mayosrs
Term 1	Term 2	Physician	Common Crawl	Pyysalo
Antinuclear antibody (ANA)	Autoimmune	5.23	0.235581	0.160654
Rheumatoid arthritis	Rheumatoid nodule	7.08	0.759468	0.841827
Rheumatoid arthritis	Joint erosion	6.15	0.312541	0.302711
Weakness	Neuropathy	4.08	0.351313	0.463371
Back pain	Spinal stenosis	5.31	0.401179	0.275127
Brainstem	Cranial nerve	4.23	0.443718	0.475813
Confusion	Delusion	6.08	0.462231	0.49885
Swallowing	Peristalsis	4.38	0.176534	0.415322
Dysphagia	Hypomotility	3.77	0.057103	0.233081
Scleroderma	Systemic sclerosis	5	0.583506	0.540181
Diarrhea	Colitis	5.54	0.581021	0.450891
Dyspepsia	Peptic ulcer disease	5.23	0.463264	0.385658
Dyspnea	Tachypnea	4.08	0.423453	0.535583
Hallucination	Psychotic	6	0.423107	0.579652
Ileitis	Crohns Disease	6.85	0.320607	0.458753
Kidney stone	Ureteral obstruction	4.69	0.318758	0.498212
Myopathy	Dermatomyositis	4.46	0.513425	0.603899
Necrosis	Liquefaction	1.92	0.236761	0.434014
Metastasis	Carcinomatosis	8.23	0.401801	0.619911
Osteoarthritis	Bone sclerosis	2.85	0.518387	0.24958
Paraneoplastic	Malignancy	5.31	0.382243	0.424087
Pneumonia	Infiltrate	4.85	0.128505	0.426064
Pulmonary embolus	Hemoptysis	2.77	0.318015	0.585499
Raynauds phenomenon	Digital ischemia	4.85	0.155259	0.149742
Stomatitis	Mouth ulcer	6.85	0.393483	0.283528
Stroke	Hemipareisis	5	-0.01725	0.004422
Drawer sign	Knee pain	3.77	0.140768	0.298977
Difficulty walking	Antalgic gait	6.69	0.265864	0.594157
Laxity	Marfan Syndrome	2.08	0.118737	0.203894
Morning stiffness	Rheumatoid arthritis	5.69	0.366031	0.157201
Trigger point	Fibromyalgia	3.54	0.150334	0.220185
Cavitation	Tuberculosis	4.08	0.123715	0.291055
Osteophyte	Heberdens node	4	0.592234	0.081849
temporal arteritis	Headache	4.69	0.157779	0.117525
HMG Co A reductase inhibitor	Hyperlipidemia	2.23	0.129633	0.030254
Aortic stenosis	Calcification	5.62	0.47844	0.597301
Arrythmia	Mitral valve	3.31	0.189641	0.12474
Rheumatoid arthritis	Arthroscopy	3.77	0.308846	0.368593
Colonoscopy	Polyp	5.46	0.417474	0.40902
Cortisone	Osteoporosis	2.85	0.272429	0.284634
Dysgeusia	Swallowing	1.92	0.18716	0.385858
Dysparunia	Ovulation	2.31	0.044152	-0.001198
Edema	Glomerular filtration rate	2.38	0.197111	0.213567
Gastrostomy	Malnutrition	4.31	0.153596	0.372134
Congestive heart failure	Portal hypertension	1.69	0.468932	0.328489
Hemolysis	Hemoglobin	5.46	0.438774	0.438873
Immunization	immunodeficient	2.15	0.186178	0.248265
Leg ulcer	Varicsoe vein	3.92	0.233027	0.073419
Leukemia	Stem cell	5.08	0.427707	0.372787
Malaria	Amebiasis	3.15	0.206385	0.505872
Panniculitis	Lipoma	3.15	0.219369	0.546933
Penicillin	Allergy	3	0.356826	0.244271
Pulmonary embolus	Pneumonia	3.23	0.510799	0.408265
Rheumatoid nodule	Lung nodule	2.38	0.783798	0.521566
Sarcoidosis	Vitamin D	1.46	0.07769	0.095872
Seizure	Headache	3.31	0.40318	0.410855
Urticaria	Buterfly rash	5.31	0.353936	0.191991
Uveitis	HLA B27	2.23	0.255574	0.16871
Vasculitis	Thrombus	3	0.311969	0.343374
Walking	Stair climbing	4.38	0.406724	0.685878
Peripheral edema	Pulmonary edema	3.92	0.83951	0.709596
Meniscus	Osteoarthritis	2.62	0.432939	0.299056
Sepsis	hypotension	1.69	0.382337	0.275236
Lymphoid hyperplasia	Xerostomia	1	0.28867	0.225911
Prostate cancer	Acid phosphatase	1.69	0.255555	0.083946
T wave	Myocardial infarction	5.23	0.093646	0.114676
Neuropathy	Paralysis	2.85	0.528355	0.563874
Injection	Synovial effusion	3.31	0.143421	0.118771
Bipolar depression	Junctional rhythm	1	0.080686	0.233863
Carpal tunnel syndrome	Alveolitis	1	0.009349	0.360626
Contraceptive	Contraindicated	1	0.160783	0.400841
Corneal ulcer	Decubitus ulcer	2	0.722337	0.733049
Diabetes	Polyp	1	0.067226	0.410988
Diabetes	Rheumatoid nodule	1	0.365646	0.364067
Dyspnea	myalgia	1	0.379982	0.401164
Heart failure	psychosis	1	0.196164	0.07088
Hematemesis	Xerostomia	1.54	0.369932	0.395886
Portal Hypertension	Nevus	1	0.116024	0.204273
Chronic obstructive pulmonary disease	Haletosis	1.08	0.022429	0.016219
Mitral stenosis	Peptic ulcer disease	1	0.496881	0.278907
Multiple myeloma	Depression	1.08	0.179626	0.026416
Osteoarthritis	Nephrolithiasis	1	0.305239	0.319155
Prothrombin	Syringe	1.77	0.168314	-0.059275
Pulmonary fibrosis	Appendicitis	1	0.389786	0.315489
Rectal polyp	Laryngeal cancer	1	0.495173	0.470337
Acute respiratory distress syndrome	Celluitis	1	0.003771	-0.017241
Sinusitis	Sinusoid	2.85	0.05448	0.354666
Sodium	Mri	1	0.038723	0.168722
Spinal cord compression	Wound compress	1	0.557371	0.345335
Tracheal stenosis	Colon cancer	1	0.255235	0.234848
Erythema nodusum	Osteoporosis	1.54	0.09562	0.238068
Small cell carcinoma of lung	Type 2 diabetes	1	0.464344	0.129209
Cervical spinal stenosis	Alcoholic cirrhosis	1	0.33138	0.117252
Antiphospholipid antibody	Acne	1.08	0.114204	0.167729
Ketoacidosis	Lupus	1.23	0.247975	0.237916
Perseveration	Venous stasis ulcer	1.31	0.065007	0.018052
Autoimmune hepatitis	Premature labor	1	0.181237	0.105278
Medial collateral ligament tear	Torsade de pointes	1.08	0.04287	0.002137
Cryptogenic cirrhosis	Gastrin	1	0.231861	0.036714
Hand splint	Splinter hemorrhage	1	0.124371	0.021887
Cerebral aneurysm	Pulmonary embolus	1.46	0.616949	0.60898
			0.29073	0.413308

## Sheet: umnsrs
Term 1	Term 2	Physician	Common Crawl	Pyysalo
Glaucoma	Fibrillation	279	0.41067	0.409769
Carbatrol	Dilantin	370.5	0.655897	0.476686
Cardiomyopathy	Tylenol	241	0.05266	0.035418
Herpes	Hyperthyroidism	142.5	0.356046	0.212032
Seasickness	Nausea	870.75	0.307031	0.284891
Coccidioidomycosis	Histoplasmosis	981.25	0.699211	0.857441
Angina	Plavix	673.75	0.372547	0.280106
Zofran	Ipecac Syrup	294.25	0.283473	0.521936
Seizures	Insulin	332.75	0.277317	0.176735
Septicemia	Dyspnea	434.5	0.357726	0.349721
Nystagmus	Incontinence	365.75	0.169849	0.260569
Seasickness	Ethanol	465	-0.021149	0.126205
Earache	Hyperacusis	760.25	0.237899	0.502983
Plague	Cholestyramine	255.25	0.041571	0.062071
Zovirax	Famvir	1052	0.812601	0.639083
Nausea	Vomiting	1039.25	0.84283	0.756534
Ketonuria	Chyluria	334.5	0.738203	0.440067
Convulsion	Ethanol	835.25	0.065377	0.200844
Parasitemia	Malaria	1239.25	0.020999	0.387655
Proteinuria	Diabetes	1047	0.324946	0.369732
Gastroenteritis	Cromolyn	391	0.206999	0.156241
Hypoproteinemia	Hunger	519.75	-0.10527	0.312449
Spiriva	Serevent	1118.5	0.722093	0.688518
Ketonuria	Folic Acid	383	0.007401	0.283273
Insulin	Glucagen	448.75	-0.12526	0.296717
Cataracts	Wheezing	217.25	0.317865	0.393831
Methadone	Ultram	663.5	0.535241	0.476314
Diabetes	Psoriasis	412	0.442849	0.385825
Blanching	Pallor	1180.75	0.213212	0.363283
Thirsty	Lasix	935.25	0.050013	0.219559
Photosensitization	Aphonia	284.25	0.217725	0.229489
Polyuria	Chyluria	189.5	0.021703	0.4606
Psoriasis	Meningism	222.25	-0.09194	0.185949
Virilism	Drooling	543	-0.01183	0.242763
Comatose	Hepatitis	565	0.046452	0.139317
Sleeplessness	Agitation	882.5	0.365867	0.553869
Neuropathy	Glucophage	487.75	0.239119	0.192533
Psoriasis	Arthritis	1148.75	0.581469	0.60789
Tuberculosis	Clubbing	631.25	0.090911	0.298196
Obesity	Diabetes	1142.25	0.730535	0.669897
Thromboembolism	Hemoptysis	852	0.344223	0.522626
Pneumoniae	Ceftiaxone	867.25	0.008591	0.128031
Cardura	Hytrin	716.25	0.838925	0.646505
Cataracts	Glucophage	272.75	0.148833	0.051166
Cirrhosis	Banana Bag	523	-0.044519	0.252863
Seizures	Carbatrol	798	0.299211	0.143191
Cataracts	Insulin	391	0.224173	0.228987
Anemia	Reticulocytosis	897	0.049961	0.417847
Convulsion	Carbatrol	844	0.26801	0.226414
Osteoporosis	Prednisolone	755	0.226575	0.191907
Seizures	Dilantin	1001.75	0.403981	0.328937
Garlic	Fish Oil	933.75	0.481998	0.360999
Dyslipidemia	Fish Oil	921.5	0.025627	0.163027
Fibrillation	Angina	725.5	0.554114	0.486427
Cefoxitin	Ceftiaxone	1154.5	-0.056509	0.003923
Deafness	Ataxia	582.75	0.453518	0.516099
Penicillin	Cefazolin	1078.75	0.456633	0.603385
Diabetes	Insulin	1155.25	0.605404	0.41711
Hemochromatosis	Anosmia	382	0.267234	0.420554
Ischemias	Mittelschmerz	398	0.020523	-0.053483
Pallor	Aspirin	406.75	0.108682	0.076438
Earache	Crowning	367.75	0.119572	0.40708
Herpes	Cholestasis	475.25	0.299064	0.17508
Dyslipidemia	Cholestyramine	889.5	0.227982	0.301361
Rabies	Acne	256.25	0.109475	0.29618
Plague	Adenitis	816.25	0.020355	0.492325
Chyluria	Menouria	239	0.745876	0.671506
Alcohol	Antabuse	743	0.316526	0.365902
Codeine	Narcan	578.5	0.330199	0.589095
Coumadin	Aspirin	1019.75	0.613586	0.512126
Vancocin	Glucotrol	829.25	0.409255	0.480905
Coccidioses	Meningitis	791.25	0.049347	0.117373
Pallor	Coumadin	638.25	0.06438	0.072411
Aneurysm	Osteoporosis	231.25	0.27172	0.345584
Ischemias	Toprol-XR	823.75	0.728412	0.76325
Flatulence	Glucagen	727.5	-0.022049	0.206739
Cefazolin	Keflex	1323	0.474804	0.591325
Osteoporosis	Thrombus	240.75	0.146647	0.197897
Encephalitis	Meningitis	1037.75	0.613036	0.588814
Hemophilia	Thromboembolism	450	0.441494	0.468692
Arthritis	Arthralgia	1091	0.339087	0.364905
Urethrorrhea	Tremor	342.5	0.016602	0.054854
Anovulation	Carboplatin	662.75	0.237365	0.1716
Albumin	Heparin	377.5	0.501941	0.486051
Polyuria	Insulin	766.75	0.194452	0.198001
Snoring	Stridor	492.75	0.278771	0.551607
Psoriasis	Coreg	194.75	0.221173	0.198136
Haemorrhoids	Infertility	191.25	0.328913	0.302653
Epilepsy	Phenobarbital	940.75	0.254836	0.26756
Epilepsy	Alcohol	566.75	0.323264	0.447952
Psoriasis	Spasm	221.25	0.220358	0.385959
Snoring	Loperamide	242	0.097587	0.135415
Arteriosclerosis	Cholestyramine	510.25	0.120128	0.100004
Myelosuppression	Snoring	358	0.077783	0.242058
Pneumoniae	Septicemia	959.25	0.410373	0.578352
Hernias	Dementia	237.75	0.102142	0.203644
Hematemesis	Vomiting	1012.25	0.425837	0.531483
Arthralgia	Pain	1206.25	0.298557	0.407807
Synthroid	Lidocaine	270.25	0.406989	0.240614
Pneumoniae	Dyspnea	833.75	0.248502	0.116745
Bandemia	Meningism	776.75	0.73904	0.284749
Glaucoma	Fibrillation	276	0.41067	0.409769
Seasickness	Carsickness	893.25	0.007913	-0.033707
Arthralgia	Clubbing	317.5	0.119152	0.58883
Hemophilia	Glucotrol	169	0.114403	0.079515
Dysuria	Plavix	212.5	0.089504	0.093326
Underexertion	Virilism	294.5	0.752956	-0.057975
Aneurysm	Silvadene	340.5	0.050452	-0.010353
Colchicine	Prednisolone	851.25	0.652883	0.643439
Hernia	Sinemet	418	0.055036	-0.030863
Overnutrition	Seizures	396.5	0.003048	0.337917
Cataracts	Pancreatitis	307.5	0.429739	0.505845
Ethanol	Alcohol	1265.5	0.430338	0.530473
Hyperthyroidism	Seizures	792.25	0.455329	0.500625
Esmolol	Amiodarone	1058.75	0.58717	0.624414
Infertility	Carboplatin	853.5	0.191108	0.14765
Arthralgia	Neuralgia	763.5	0.355003	0.381763
Anoxemia	Propofol	477.75	-0.013388	0.235325
Dizziness	Atenolol	617.75	0.310768	0.174049
Pancreatitis	Insulin	749.5	0.406834	0.363329
Gastroenteritis	Insulin	351.75	0.180696	0.144489
Leukopenia	Cefaclor	343	0.221425	0.278207
Histoplasmosis	Prednisolone	290	0.224209	0.16632
Neuropathy	Constipation	477.25	0.503084	0.418559
Clubbing	Dyspnea	930.75	0.102269	0.40708
Hemiplegia	Plavix	704.5	0.12524	0.109038
Mycosis	Lipitor	300.5	0.013734	0.108348
Rheumatism	Colchicine	775.25	0.194841	0.133259
Dyspnea	Penicillin	384	0.197462	0.110266
Cirrhosis	Hematemesis	1040.25	0.257461	0.319913
Hemicrania	Headache	748.75	0.29011	0.312478
Loperamide	Dulcolax	767	0.511251	0.495157
Sluggishness	Fatigue	1186.5	0.331666	0.253213
Cardiomyopathies	Syncope	869.5	0.365428	0.516306
Anoxemia	Seizures	748	0.019136	0.475019
Seasickness	Ethanol	646	-0.021149	0.126205
Dyslipidemia	Iron	239	-0.054625	0.342785
Thalassemia	Tremor	231.5	0.22686	0.381077
Convulsion	Wellbutrin	869.25	0.190537	0.210223
Angina	Levophed	398.75	0.226113	0.198761
Myositis	Medrol	792.75	0.112013	0.126744
Anovulation	Mittelschmerz	558.25	0.377183	0.396353
Earache	Amoxil	855.25	0.148001	0.200948
Ischemias	Aloe Vera	253.5	-0.002528	0.079478
Bronchitis	Singulair	737.25	0.345794	0.201972
Lipitor	Lovastatin	1174.75	0.665595	0.472203
Pneumoniae	Weakness	633.75	0.084259	0.208864
Spasm	Lasix	415.75	0.232812	0.225824
Torticollis	Erythromycin	343	0.131443	0.078413
Dermatitis	Allergy.	1188	-0.117547	0.473265
Silvadene	Ketamine	293.75	0.194244	0.191837
Arteriosclerosis	Ischemias	751.75	0.007438	-0.002837
Hemochromatosis	Polyuria	309.5	0.357085	0.293013
Metatarsalgia	Toothache	573.25	0.264325	0.574415
Dehydration	Starvation	977	0.485248	0.564095
Colitis	Epilepsy	163	0.481962	0.404402
Diabetes	Polydipsia	1031.5	0.152131	0.24189
Ketonuria	Starvation	1225.25	-0.136267	0.312162
Seizures	Valproic Acid	911	0.282956	0.330854
Gonorrhea	Plavix	173	0.173136	0.080378
Banana Bag	Vitamin B1	893	0.144845	0.076316
Hypothyroidism	Weakness	904.75	0.274573	0.397556
Thalassemia	Hemoglobinopathy	1307	0.061094	0.576282
Reticulocytosis	Aspirin	670.75	0.062634	0.158539
Mycosis	Carboplatin	340.5	0.260468	0.151878
Mycoses	Meningitis	975.5	0.240257	0.511819
Pallor	Iron	901.75	-0.069915	0.164093
Maculopapule	Macule	1090	0.741716	0.727209
Heartburn	Motrin	644	0.314273	0.263684
Aloe Vera	Vicodin	187.5	0.074471	0.235478
Codeine	Robitussin	830.75	0.459809	0.529442
Acetylcysteine	Adenosine	256.25	0.392059	0.206194
Cromolyn	Prednisolone	856	0.525165	0.510346
Spasm	Opisthotonus	665.75	-0.073314	0.272809
Diarrhea	Cefaclor	508.75	0.193377	0.258033
Ceftazidime	Ceftiaxone	1086.5	-0.026677	0.033882
Pain	Morphine	996.75	0.392869	0.334699
Narcan	Duragesic	484.25	0.389014	0.488659
Vasculitis	Hemiplegia	363.5	0.366277	0.515739
Colchicine	Probenecid	1098.75	0.686353	0.643293
Cozaar	Diovan	1243.5	0.831566	0.674116
Cirrhosis	Anemia	727.5	0.538103	0.599079
Cefepime	Bacitracin	648.25	0.382104	0.551379
Smallpox	Vaccinia	721.5	0.484993	0.438491
Starvation	Mittelschmerz	145.5	0.173564	0.100783
Photosensitization	Dermatitis	957.75	0.248761	0.252391
Dexamethasone	Actonel	472	0.526886	0.246241
Hepatitis	Tylenol	880.25	0.250442	0.027306
Ischemias	Drooling	468.75	0.007922	0.085174
Hernias	Earache	179.75	0.146835	0.498004
Goiter	Scleroderma	394	0.285452	0.343636
Ataxia	Ethanol	840.25	0.132526	0.092653
zoonosis	Babesiosis	1136.75	0.460155	0.748635
Rhonchi	Rales	1075.5	0.033925	0.571708
Tiredness	Atenolol	537	0.292071	0.127782
Atherosclerosis	Angina	936	0.549302	0.4348
Hepatitis	Hematemesis	778	0.095963	0.108527
Narcan	Morphine	571.5	0.35862	0.609424
Diarrhea	Colchicine	794.5	0.257545	0.279388
Myositis	Myopathy	1103	0.588597	0.545014
Bronchitis	Loperamide	242.75	0.181541	0.22681
Dysuria	Cipro	615.5	0.198328	-0.00305
Levaquin	Avelox	1120.25	0.783528	0.387724
Hyperacusis	Bleomycin	607.5	0.198508	0.136355
Chloramphenicol	Ceftiaxone	652.75	-0.004356	0.027469
Cefaclor	Cefoxitin	1174.5	0.484077	0.813401
Erythromycin	Lidocaine	430	0.569046	0.406936
Hypothyroidism	Infertility	598	0.547138	0.513569
Protonix	Tums	971.75	0.412238	0.386175
Catatonia	Lethargy	890	0.268045	0.460102
Schistosomiasis	Cardura	201.75	0.167196	0.054379
Polydipsia	Polyuria	1135.5	0.71179	0.620535
Cirrhosis	Lipitor	390.5	0.228474	0.143665
Stridor	Snoring	646.5	0.278771	0.551607
Atenolol	Lasix	708.25	0.695516	0.534378
Prostatism	Cipro	744.5	0.019781	0.07739
Dehydration	Dysentery	925.75	0.426529	0.39128
Enalapril	Lisinopril	1280	0.639857	0.865241
Hyperemesis	Carboplatin	765.25	0.106934	0.049717
Reticulocytosis	Hematemesis	427	0.066104	0.37363
Uremias	Hypersomnolence	657.5	0.743496	-0.043557
Myopathy	Trembling	555.25	0.166411	0.310044
Infertility	Fibrillation	346	0.33332	0.268907
Ketonuria	Insulin	891.5	-0.071532	0.208074
Blastomycoses	Seizures	579.75	0.034613	0.011904
Candidiasis	Prostatorrhea	383.5	-0.060773	0.077424
Heparin	Protamine Sulfate	691	0.595915	0.593377
Cardiomyopathy	Rales	705.75	0.189663	0.210742
Mycosis	Pain	355.25	0.064615	0.1558
Proteinuria	Rogaine	285.25	0.06849	0.119689
Angina	Dyspnea	642.25	0.446001	0.563615
Bacteremia	Amauroses	445	-0.010818	0.052997
Dyslipidemia	Lipitor	1029.5	0.247061	0.206382
Uremias	Emaciation	499.5	-0.02545	0.030459
Osteoporosis	Cardiomyopathy	295.25	0.398079	0.40287
Hyperemesis	Nausea	1240.25	0.372905	0.26973
Parasitemia	Cardialgia	331	0.717852	0.093587
Neuropathy	Insulin	754.75	0.376576	0.334537
Seasickness	Clubbing	306.25	0.132042	0.465764
Iron	Iron	1395	1	1
Cardialgia	Loperamide	279.5	0.040399	0.164209
Rheumatism	Tylenol	923.5	0.161742	0.092737
Brucellosis	zoonosis	1195.75	0.489229	0.735931
Atenolol	Toprol-XR	1279.25	-0.008487	0.041785
Emaciation	Cachexia	1290.25	0.389778	0.413235
Aphonia	Mittelschmerz	214.25	0.25977	0.329591
Starvation	Anorexia	1176.75	0.365904	0.233939
Blepharospasm	Coumadin	207.75	0.115725	0.173122
Ampicillin	Amoxil	1238	0.800885	0.562347
Angina	Diarrhea	270.75	0.402299	0.342447
Lasix	Mannitol	658.5	0.263786	0.399786
Uremias	Pyorrhea	551	-0.091272	0.014677
Incontinence	Lasix	739.5	0.143992	0.111105
Thromboembolism	Heparin	969.75	0.45713	0.414435
Exophthalmos	Prostatism	243.5	-0.049199	0.546486
Uremias	Aspirin	256	0.039707	0.009331
Sinemet	Gifulvin	240.25	0.095965	0.076546
Allergy	Bacitracin	203	0.146136	0.203335
Hernia	Goiter	354.75	0.375923	0.390791
Dehydration	Syncope	897.75	0.426526	0.420923
Fish-mouthing	Polyuria	303.25	-0.023617	0.059741
Arthritis	Rheumatism	1153.25	0.63993	0.504843
Infertility	Anovulation	1192.75	0.387798	0.524199
Bronchitis	Serevent	939.25	0.207773	0.292374
Mycosis	Histoplasmosis	1282.5	0.515035	0.497565
Cataracts	Diabetes	652.75	0.351918	0.364866
Overnutrition	Malnutrition	160.75	-0.086167	0.508791
Convulsion	Epilepsy	1302.75	0.28253	0.432598
Cyanosis	Folic Acid	365.5	0.110927	0.196361
Infertility	Blepharospasm	225.25	0.196582	0.253506
Neuropathy	Diabetes	1032	0.495535	0.509148
Erythromycin	Allopurinol	345.5	0.69644	0.435014
Heartburn	Protonix	981.5	0.393941	0.308453
Pallor	Weakness	1109.5	0.249432	0.47914
Hyperextension	Lopid	258.75	0.050342	0.128838
Weakness	Paresis	1158.25	0.189281	0.670334
Hypothyroidism	Synthroid	984.75	0.46846	0.211852
Grimaces	Hemiballismus	634	-0.096685	-0.007452
Exophthalmos	Synthroid	928.5	0.106641	0.183398
Infertility	Anovulation	1276.5	0.387798	0.524199
Dizziness	Vertigo	1287	0.488984	0.689019
Dyslipidemia	Angina	806	0.464897	0.330134
Giardiasis	Avitaminoses	422	-0.022064	0.390345
Seizures	Aloe Vera	167.75	-0.009151	0.071106
Zoloft	Prozac	1138.75	0.899815	0.740441
Peritonitis	Ataxia	281.75	0.262791	0.18133
Actonel	Fosamax	1276.5	0.830059	0.665951
Arthralgia	Chyluria	201	-0.030545	0.439993
Clubbing	Constipation	167.75	0.086482	0.369078
Plavix	Lipitor	895.5	0.763964	0.591201
Primatine	Levophed	394.5	-0.042503	-0.00582
Constipation	Diarrhea	161	0.770338	0.757111
Arthritis	Cirrhosis	618.5	0.355434	0.416586
Meningitis	Tuberculosis	871.25	0.590369	0.582144
Dizziness	Ethanol	893.25	0.104102	0.097299
Cataracts	Narcan	263.5	0.012031	0.073025
Agitation	Morphine	527.5	0.257322	0.295321
Anosmia	Aphonia	845	0.410829	0.658014
Drooling	Sinemet	662.75	0.162777	0.116208
Cirrhosis	Methotrexate	706.25	0.305089	0.280423
Glaucoma	Headache	841.25	0.434228	0.362777
Syncope	Weakness	737	0.304695	0.435809
Regurgitation	Heartburn	1106.5	0.37581	0.599251
Activase	Streptase	762.75	0.006615	0.410966
Zithromax	Cipro	965	0.802578	0.546255
Catatonia	Narcan	458	0.03723	0.267985
Arthralgia	Tylenol	869.25	0.15379	0.328672
Blepharospasm	Bedwetting	321.25	0.216193	0.438883
Photopsia	Headache	632	-0.033669	0.186628
Meningitis	Headache	1221.25	0.350981	0.360232
Glyburide	Avandia	1128.25	0.545022	0.511858
Atherosclerosis	Cardialgia	997.75	-0.025783	0.182742
Anosmia	Catch	274.5	-0.094103	0.127345
HYPEREMESIS	Zofran	738.5	0.064857	0.10616
Angina	Corkscrewing	666.25	-0.043732	0.042809
Thrombophilias	Hemoptysis	469.75	0.068312	0.373345
Obesity	Xenical	1007.25	0.318182	0.253759
Glucotrol	Motrin	330.5	0.434192	0.51024
Atherosclerosis	Influenzae	257.75	0.197173	0.168679
Scapulalgia	Halitosis	233.5	-0.075742	-0.107728
Hepatomegaly	Hepatosplenomegaly	1164.75	0.06331	0.749049
Anosmia	Digoxin	293	0.208137	0.253331
Meningitis	Vancocin	960.25	0.127863	0.241772
Hypersomnolence	Snoring	764	-0.00108	0.575005
Prostatorrhea	Cipro	981.25	0.029989	0.017414
Flatulence	Halitosis	802.25	0.527642	0.482979
Flushing	Iron	511.5	-0.00053	0.204242
Mittelschmerz	Aphonia	199.25	0.25977	0.329591
Hemochromatosis	Arthritis	858.25	0.26547	0.285671
Clubbing	Vitamin K	360.5	-0.05565	-0.010759
Mittelschmerz	Toothache	567.75	0.284139	0.332648
Thirsty	Hunger	935.75	0.159291	0.316007
Sciatica	Motrin	854.5	0.167752	0.172227
Bronchitis	Pneumonia	1019.75	0.671955	0.67416
Candidiasis	Medrol	390.25	0.180196	0.242437
Snoring	Ethanol	706.25	0.080432	0.123103
Fibrillation	Calamine	256	0.025058	0.007531
Digoxin	Cardizem	1045	0.614453	0.370037
Xanax	Ativan	1269	0.891196	0.721988
Hepatitis	Cirrhosis	1173	0.592125	0.436104
Dyspnea	Medrol	836	0.097086	0.133362
Clubbing	Garlic	194	0.022453	0.123128
Rheumatism	Sleeplessness	384.75	0.367869	0.136087
Rheumatism	Prednisolone	883.25	0.193935	0.130624
Diabetes	Hyperglycemia	1234.75	0.463919	0.491074
Fibrillation	Coumadin	1106.75	0.376138	0.185798
Hemicrania	Nitroglycerine	298.75	0.368418	0.186817
Thromboembolism	Fibrillation	1026.5	0.599341	0.519494
Hemoptysis	Coumadin	936.75	0.063346	0.253168
Osteoporosis	Actonel	811.25	0.457919	0.281059
Ataxia	Constipation	309.25	0.292397	0.304971
Mycosis	Coccidioses	1137.25	0.044152	0.182796
Sciatica	Underexertion	375.25	-0.115656	-0.033671
Catapres	Toprol-XR	921.25	-0.009678	0.078973
Appendicitis	Cefazolin	889.5	0.218635	0.117288
Ceftiaxone	Cefoxitin	1202.25	-0.056509	0.003923
Hemicrania	Tylenol	619.5	0.151134	0.26126
Plavix	Coumadin	1183.5	0.782905	0.622484
Gastroenteritis	Dysentery	1255.75	0.506274	0.683434
Epilepsy	Hepatomegaly	208.25	0.138618	0.307889
Hypoproteinemia	Hunger	886.5	-0.10527	0.312449
Dyspnea	Serevent	815.25	0.196868	0.205082
Prilosec	Glucophage	305.75	0.577623	0.611494
Cisplatin	Zofran	645.5	0.421384	0.316551
Medrol	Prednisolone	1387.5	0.717432	0.638497
Ischemias	Lipitor	953.25	0.00261	-0.065852
Scapulalgia	Nitroglycerine	246.75	0.003034	-0.067393
Mycosis	Blastomycoses	1118.5	0.034552	0.220365
Nausea	Zofran	974	0.417052	0.291534
Cholestyramine	Zetia	1184	0.402342	0.393029
Weakness	Zocor	889.75	0.166642	0.084527
Urethrorrhea	Aphonia	233.25	-0.034319	0.065922
Carboplatin	Cisplatin	1273.5	0.848929	0.878232
Neuropathy	Syphilis	1034	0.336087	0.427619
Syphilis	Penicillin	1094.25	0.426523	0.354279
Isosorbide	Toprol-XR	1031.5	0.036925	0.040743
Nephritis	Pyorrhea	807.5	0.282175	0.304781
Doxycyline	Penicillin	680.75	0.342218	0.382841
Uremias	Motrin	393.25	-0.011638	0.057622
Rales	Cyanosis	687.5	0.219495	0.526142
Hyperextension	Hunger	338	-0.025217	0.117312
Mittelschmerz	Actonel	307.5	0.14882	0.269732
Cirrhosis	Hemochromatosis	956	0.477117	0.491231
Pancreatitis	Cataract	342	0.334494	0.473652
Pancreatitis	Maculopapule	348.5	-0.082348	-0.031701
Thromboembolism	Dyspnea	962.5	0.382408	0.345123
Hepatitis	Hepatomegaly	910.25	0.234925	0.117324
Hyperacusis	Aphonia	431.75	0.305138	0.53339
Thrombocytopenia	Heartburn	328.5	0.316159	0.373626
Appendicitis	Peritonitis	934.75	0.561375	0.704339
Metatarsalgia	Colchicine	792.25	0.067917	0.175637
Bandemia	Granulocytosis	683.25	0.772463	0.200135
Levophed	Propofol	784	0.324126	0.410394
Rheumatism	Polyarthritides	1124.75	-0.111215	-0.051824
Chills	Snoring	322.5	0.201476	0.359232
Camelpox	Echinacea	450	-0.036215	-0.070148
Overnutrition	Sandimmune	232.75	0.011345	-0.009888
Leukopenia	Bleomycin	890	0.273628	0.233805
Synthroid	Armor Thyroid	483.75	0.430911	0.198288
Atherosclerosis	Urethrorrhea	212.25	0.016132	-0.056319
Fibrillation	Synthroid	881.5	0.17725	0.094754
Thrombophilias	Coumadin	846.75	0.031176	0.234157
Hemiplegia	Headache	561.5	0.313827	0.430437
Atherosclerosis	Toothache	224.5	0.139004	0.210458
Clonus	Spasm	967	0.31146	0.446683
Pyorrhea	Nephritis	777.5	0.282175	0.304781
Dyspnea	Narcan	578.25	0.243287	0.074616
Brucellosis	Narcan	199.75	0.115309	0.049066
Meningism	Hyperesthesia	536.75	0.760657	0.511017
Thalassemia	Iron	892.5	0.041245	0.424617
Nitroglycerine	Toprol-XR	785.25	-0.012241	-0.044536
Allergy	Meningism	319.5	0.005121	0.076787
Hyperoxia	Xenical	343.5	0.046691	0.029442
Airsickness	Osteoporosis	206.5	-0.063805	0.383242
Constipation	Cardizem	178.75	0.179021	0.162945
Candidiasis	Mycosis	1151.25	0.476332	0.385287
Zocor	Fish Oil	923.5	0.060432	0.082011
comatose	Anoxemia	668	-0.103101	0.249264
Angina	Cardialgia	863	-0.047021	0.281564
Vasculitis	Convulsion	372.5	0.293044	0.366518
Syncope	Xanax	618.25	0.183767	0.150586
Gonorrhea	Xenical	193.75	0.155308	0.088037
Hyperoxia	Xenical	197.25	0.046691	0.029442
Schistosomiasis	Parasitemia	1187.5	-0.047221	0.329004
Lipitor	Zocor	1330.75	0.905836	0.803441
Snoring	Welts	327.5	0.063554	-0.001188
Anoxemia	Ataxia	496.75	0.048904	0.31276
comatose	Cataracts	265.25	0.035622	0.203804
Wellbutrin	Endep	309	0.45052	0.107228
Anosmia	Constipation	244.25	0.214529	0.543706
Headache	Flushing	413.25	0.23627	0.250951
Bandemia	Nausea	503.25	0.000903	0.163836
Phenobarbital	Valproic Acid	1046.5	0.508651	0.468662
Bleomycin	Antabuse	337.75	0.296733	0.277046
Avitaminoses	Starvation	984.75	-0.112247	0.124868
Mycosis	Medrol	388.75	0.107846	0.128069
Polyarthritides	Arthralgia	1126	0.017221	0.025015
Cardiomyopathy	Angina	861.5	0.575501	0.530755
Cirrhosis	Zocor	498	0.228888	0.134887
Hunger	Starvation	1134.5	0.392777	0.357139
Hypothyroidism	comatose	710.75	0.044728	0.245271
Influenzae	Amantadine	919	0.216926	0.066115
Tylenol	Motrin	1067	0.814212	0.620166
Hyperoxia	Anoxemia	252	-0.057283	0.452359
Ischemias	Isosorbide	837.5	0.049951	0.115222
Anovulation	Torticollis	228	0.316875	0.226812
Tuberculosis	Hemoptysis	789.5	0.240978	0.378475
Fibrillation	Angina	788.5	0.554114	0.486427
Hypothyroidism	Tiredness	948.75	0.460646	0.294759
Syphilis	Dementias	960.5	0.13446	0.444785
Carboplatin	Zofran	940	0.419243	0.349845
Drooling	Chills	395	0.307176	0.287351
Arthritis	Underexertion	333.25	-0.006382	0.008356
Diabetes	Polyuria	1066	0.191605	0.22857
Hemoptysis	Hematemesis	908.25	0.438206	0.622383
Proteinuria	Lisinopril	926.5	0.244439	0.485639
Drooling	Sinemet	800.75	0.162777	0.116208
Pallor	Albumin	528.75	0.135885	0.218584
Syphilis	Gonorrhea	1132.25	0.735602	0.739199
Cataracts	Scapulalgia	288.5	0.016906	0.005133
Epilepsy	Ativan	836.5	0.244546	0.190807
Adenitis	Stridor	666.25	0.261104	0.476447
Heartburn	Pepcid	893.5	0.391416	0.232992
Clubbing	Spiriva	846.75	0.055983	0.190466
Asthma	Urolithiasis	286	0.15001	0.38399
Thromboembolism	Coumadin	964.75	0.319624	0.323193
Fibrillation	Halitosis	348	0.211711	0.19722
Glomerulosclerosis	Proteinuria	858	0.483266	0.566114
Nocturia	Diabetes	775.25	0.170808	0.298549
Seizures	Calamine	190.75	0.128186	-0.023149
Scapulalgia	Metatarsalgia	870.25	-0.011698	-0.004793
Allopurinol	Colchicine	1142.25	0.788433	0.654536
Hemochromatosis	Arthralgia	774.25	0.269529	0.271503
Amantadine	Tamiflu	1193	0.603342	0.572461
Meningitis	Ceftiaxone	1030	-0.024437	0.104637
Myositis	Lipitor	853.75	0.193449	0.067771
Pneumonia	Cyanosis	623.25	0.297884	0.473894
Thromboembolism	Syncope	728.5	0.475797	0.543125
Cluttering	Nitroglycerine	219.5	0.261796	0.084421
Thrombocytopenia	Arthritis	306.5	0.274966	0.22477
Syncope	Atenolol	639.5	0.286593	0.258093
Tremor	Sinemet	840.5	0.216659	0.194449
Epilepsy	Anosmia	404.25	0.22659	0.428952
Agitation	Synthroid	637.5	0.141862	0.172279
Anovulation	Emaciation	574	0.296001	0.49977
Erythema	Dilantin	468.5	0.251432	0.231945
Dehydration	Candidiases	547	-0.077991	0.19511
Rales	Hyperacusis	251.25	0.291624	0.345222
Cortisone	Adenosine	214.75	0.374426	0.246357
Headache	Tylenol	879.5	0.402625	0.171192
Arthritis	Metatarsalgia	769	0.24533	0.256492
Erythema	Tremor	316	0.284649	0.216819
Obesity	Snoring	860	0.393243	0.41231
Dyspnea	Cyanosis	1052.25	0.442296	0.522326
Uremias	Nausea	621.25	-0.017942	-0.017429
Prostatism	Prostatorrhea	964.75	0.758769	0.04839
Hemoglobinopathy	Pain	505.25	-0.058358	0.300957
comatose	Hyperglycemia	922.25	0.135339	0.24373
Weakness	Emaciation	956.25	0.24297	0.45416
Thirsty	Hunger	819	0.159291	0.316007
Dyspnea	Spiriva	1075.5	0.247722	0.192174
Dyslipidemia	Activase	531.75	0.213156	0.095829
Leukopenia	Penicillin	416.25	0.19365	0.22832
Meningitis	Meningism	864.5	-0.030216	0.426052
Weakness	Glucagen	368	-0.093855	0.064766
Constipation	Calan	193	0.075774	0.184479
Fibrillation	Atenolol	817.25	0.296006	0.238492
Goiter	Vasculitis	324.75	0.34821	0.391742
Nocturia	Bacitracin	353.75	0.177711	0.09887
Hyperthyroidism	Osteoporosis	493.75	0.434952	0.440932
Dyslipidemia	Hyperlipidemia	809.5	0.762158	0.880411
Pallor	Blanching	955	0.213212	0.363283
Vfend	Prozac	193.25	0.263508	0.286912
Hemoptysis	Protamine Sulfate	544	0.153421	0.167129
Mastodynia	Earache	807.5	-0.034072	0.504838
Rales	Lasix	742	0.063864	0.216893
Anemia	Coumadin	623.75	0.35032	0.09602
Sinemet	Sinemet	1533.5	1	1
Dermatitis	Aloe Vera	695	0.239851	0.229532
Coccidioses	Medrol	388.5	0.05719	0.08172
Tiredness	Hypersomnolence	1055.25	-0.097549	0.605735
Polyuria	Ketonuria	993.25	-0.013342	0.557236
Toothache	Ataxia	255.5	0.173732	0.23389
Mannitol	Tylenol	223	0.164122	0.228319
Otitis	Meningism	567	-0.104064	0.265969
Clonus	Wellbutrin	317.5	0.017277	0.18577
Anemia	Plavix	539.5	0.2887	0.048908
Fish Oil	Zocor	809.5	0.060432	0.082011
Nocturia	Ethanol	680.25	0.114578	0.135221
Weakness	Cortisone	682	0.168164	0.121068
Dyslipidemia	Constipation	318.5	0.281343	0.445998
Mycosis	Prostatism	271.5	-0.017439	0.283723
Dementia	Aloe Vera	223.5	0.077393	0.093613
Dysentery	Esmolol	229.5	0.125398	0.095476
Plague	Vivarin	278.5	0.047736	-0.024972
Rabies	Silvadene	239	0.048108	0.089992
Influenza	Pneumoniae	898.5	0.250792	0.274579
Rabies	Head-Face-Neck-Syndrome	417.25	0.007138	0.114065
Plavix	Insulin	286.25	0.3182	0.091131
Giardiasis	Mannerism	152.75	0.124413	0.062057
Psoriasis	Atherosclerosis	169.5	0.351807	0.417232
Propranolol	Bactroban	318.75	0.510034	0.21916
Toothache	Hytrin	224.75	0.116561	0.35699
Dermatomyositis	Myopathy	1019.5	0.513425	0.603899
Starvation	Cisplatin	319	0.177578	0.303457
Anovulation	Amenorrhoea	1099.5	0.461606	0.680521
Agranulocytosis	Anemia	933.25	0.473566	0.540341
Torticollis	Spasm	1104	0.357209	0.418011
Tiredness	Calan	233.75	0.061215	0.134101
Calamine	Bleomycin	227	0.324326	0.086726
Hemochromatosis	Vermox	212.25	0.096555	0.09005
Anovulation	Sinemet	326.25	0.230004	0.157732
Hyperextension	Bacitracin	261.25	0.109968	0.141025
Albuterol	Serevent	949.5	0.70849	0.665012
Arthritis	Amyloidoses	724.25	0.004831	0.162378
Cyanosis	Primatine	456.5	-0.006911	0.013131
Pepcid	Zantac	1247.25	0.84897	0.770427
Epilepsy	Ischemia	506.75	0.32185	0.395173
Carsickness	Nausea	1168.75	-0.000498	0.070748
Fibrillation	Cardiomyopathies	764.5	0.321744	0.371361
zoonosis	Plague	997.25	0.167854	0.539578
Meningism	Zovirax	713.5	-0.030207	0.234915
Abortions.spontaneous	Listeriosis	781.5	-0.015415	0.050091
Dyspnea	Agitation	593.25	0.353942	0.467593
Encephalitis	Headache	1052.5	0.2677	0.280036
Epilepsy	Actonel	329.25	0.15365	0.113143
			0.363829	0.420302
